# Supplementary material for: Development of a patient-reported outcome measure for neck pain in military aircrew: qualitative interviews to inform design and content
Source: HighWire-hosted journal article supplement (doi:10.1136/bmjopen-2020-039488), 2021-02-01
Supplement: bmjopen-2020-039488supp001_data_supplement.pdf [file bmjopen-2020-039488supp001_data_supplement.pdf]

**Supplementary file 1. COREC 32-Item Checklist**

| No. Item                                      | Guide questions/description                                                                             | Reported on Page #, line # |
|-----------------------------------------------|---------------------------------------------------------------------------------------------------------|----------------------------|
| Domain 1: Research team and reflexivity       |                                                                                                         |                            |
| 1. Inter viewer/facilitator                   | Which author/s conducted the interview?                                                                 | 4, 125                     |
| 2. Credentials                                | What were the researcher's credentials?                                                                 | 4, 128                     |
| 3. Occupation                                 | What was their occupation at the time of the study?                                                     | 4, 125                     |
| 4. Gender                                     | Was the researcher male or female?                                                                      | 1, 5                       |
| 5. Experience and training                    | What experience or training did the researcher have?                                                    | 4, 125-126                 |
| 6. Relationship with participants established | Was a relationship established prior to study commencement?                                             | 4, 127                     |
| 7. Participant knowledge of the interviewer   | What did the participants know about the researcher?                                                    | 4, 125-127                 |
| 8. Interviewer characteristics                | What characteristics were reported about the interviewer/facilitator?                                   | 4, 125-127                 |
| Domain 2: study design                        |                                                                                                         |                            |
| 9. Methodological orientation and theory      | What methodological orientation was stated to underpin the study?                                       | 4, 109-110                 |
| 10. Sampling                                  | How were participants selected?                                                                         | 7, 141                     |
| 11. Method of approach                        | How were participants approached?                                                                       | 7, 147-148                 |
| 12. Sample size                               | How many participants were in the study?                                                                | 7, 143                     |
| 13. Non-participation                         | How many people refused to participate or dropped out? Reasons?                                         | 7, 147-148                 |
| 14. Setting of data collection                | Where was the data collected?                                                                           | 4, 118                     |
| 15. Presence of non-participants              | Was anyone else present besides the participants and researchers?                                       | 4, 128-129                 |
| 16. Description of sample                     | What are the important characteristics of the sample?                                                   | 9, 189-192                 |
| 17. Interview guide                           | Were questions, prompts, guides provided by the authors?                                                | 6                          |
| 18. Repeat interviews                         | Were repeat interviews carried out?                                                                     | No                         |
| 19. Audio/visual recording                    | Did the research use audio or visual recording to collect the data?                                     | 4, 128                     |
| 20. Field notes                               | Were field notes made during and/or after the interview?                                                | 2, 40                      |
| 21. Duration                                  | What was the duration of the interviews                                                                 | 4, 127                     |
| 22. Data saturation                           | Was data saturation discussed?                                                                          | 7, 170-171 & Table 2       |
| 23. Transcripts returned                      | Were transcripts returned to participants correction?                                                   | No                         |
| Domain 3: analysis and findings               |                                                                                                         |                            |
| 24. Number of data coders                     | How many data coders coded the data?                                                                    | 7-8, 167-182               |
| 25. Description of the coding tree            | Did authors provide a description of the coding tree?                                                   | 7-8, 167-182               |
| 26. Derivation of themes                      | Were themes identified in advance or derived from the data?                                             | 7, 169-182                 |
| 27. Software                                  | What software, if applicable, was used to manage the data?                                              | n/a                        |
| 28. Participant checking                      | Did participants provide feedback on the findings?                                                      | No                         |
| 29. Quotations presented                      | Were participant quotations presented to illustrate the themes/findings? Was each quotation identified? | 10, Table 3                |
| 30. Data and findings consistency             | Was there consistency between the data presented and the findings?                                      | 9, 204-205 & Table 3       |
| 31. Clarity of major themes                   | Were major themes clearly presented in the findings?                                                    | Page 9-13 & Table 3        |
| 32. Clarity of minor themes                   | Is there a description of diverse cases or discussion of minor themes?                                  | Page 9-13 & Table 3        |
