# Supplementary material for: Development of a patient-reported outcome measure for neck pain in military aircrew: qualitative interviews to inform design and content
Source: HighWire-hosted journal article supplement (doi:10.1136/bmjopen-2020-039488), 2021-02-01
Supplement: bmjopen-2020-039488supp002_data_supplement.pdf [file bmjopen-2020-039488supp002_data_supplement.pdf]

## Supplementary file 2. Neck pain patient reported outcome measures

| Item activity                   | NDI | NPDS | NPQ          | NBQ                                                                           | CNFDS                                                                       | WDQ                               |
|---------------------------------|-----|------|--------------|-------------------------------------------------------------------------------|-----------------------------------------------------------------------------|-----------------------------------|
| Pain intensity                  | ✓   | ✓    | ✓            | ✓ over past week                                                              |                                                                             | ✓                                 |
| Personal care                   | ✓   | ✓    |              |                                                                               | ✓ getting dressed in same time ✓ bend over sink to brush teeth without pain | ✓                                 |
| Lifting                         | ✓   |      |              |                                                                               | ✓ objects from 2-4kg                                                        |                                   |
| Reading                         | ✓   |      | ✓+ TV        |                                                                               | ✓                                                                           |                                   |
| Headaches                       | ✓   |      |              |                                                                               | ✓                                                                           |                                   |
| Concentration                   | ✓   | ✓    |              |                                                                               | ✓                                                                           | ✓                                 |
| Work                            | ✓   | ✓    | ✓+ housework | ✓ inside & out home over past week                                            |                                                                             | ✓+ home/study duties              |
| Driving                         | ✓   | ✓    | ✓            |                                                                               |                                                                             | ✓ or using public transport       |
| Sleeping                        | ✓   | ✓    | ✓            |                                                                               | ✓                                                                           | ✓                                 |
| Recreation                      | ✓   | ✓    |              | ✓ +social & family over past week                                             | ✓ leisure with family                                                       | ✓ non sporting leisure activities |
| Average pain                    |     | ✓    |              |                                                                               |                                                                             |                                   |
| Worst pain                      |     | ✓    |              |                                                                               |                                                                             |                                   |
| Standing                        |     | ✓    |              |                                                                               |                                                                             |                                   |
| Walking                         |     | ✓    |              |                                                                               |                                                                             |                                   |
| Social activities               |     | ✓    | ✓            |                                                                               | ✓ going out with others                                                     | ✓                                 |
| Personal relationships          |     | ✓    |              |                                                                               | ✓ with family                                                               |                                   |
| Outlook on life                 |     | ✓    |              |                                                                               |                                                                             |                                   |
| Emotions                        |     | ✓    |              |                                                                               |                                                                             |                                   |
| Neck stiffness                  |     | ✓    |              |                                                                               |                                                                             |                                   |
| Turning head                    |     | ✓    |              |                                                                               |                                                                             |                                   |
| Looking up & down               |     | ✓    |              |                                                                               |                                                                             |                                   |
| Working overhead                |     | ✓    |              |                                                                               |                                                                             |                                   |
| Pain pills helpful              |     | ✓    |              |                                                                               |                                                                             |                                   |
| Pins & needles in arms at night |     |      | ✓            |                                                                               |                                                                             |                                   |
| Symptom duration                |     |      | ✓            |                                                                               |                                                                             |                                   |
| Carrying                        |     |      | ✓            |                                                                               |                                                                             |                                   |
| Diff since last NPQ             |     |      | ✓            |                                                                               |                                                                             |                                   |
| Daily activities                |     |      |              | ✓ housework, washing, dressing, lifting, reading, driving over past week      | ✓ as before with pain & ✓ without help from others                          |                                   |
| Anxious                         |     |      |              | ✓ tense, uptight, irritable, difficulty concentrating/relaxing over past week |                                                                             | ✓                                 |
| Depression/sadness              |     |      |              | ✓ down in dumps, sad, in low spirits, pessimistic, unhappy over past week     |                                                                             | ✓                                 |
| Self control of pain            |     |      |              | ✓ over past week                                                              |                                                                             |                                   |
| More time at home               |     |      |              |                                                                               | ✓                                                                           |                                   |
| More time in bed                |     |      |              |                                                                               | ✓                                                                           |                                   |
| Disruption of future            |     |      |              |                                                                               | ✓                                                                           |                                   |
| Tiredness/fatigue               |     |      |              |                                                                               |                                                                             | ✓                                 |
| Sport                           |     |      |              |                                                                               |                                                                             | ✓                                 |
| Anger                           |     |      |              |                                                                               |                                                                             | ✓                                 |

Abbreviations: NDI= Neck Disability Index, NPDS = Neck Pain and Disability Questionnaire, NPQ = Northwick Park Neck Pain Questionnaire, NBQ = Neck Bournemouth Questionnaire, CNFDS = Copenhagen Neck Functional Disability Scale, WDQ = Whiplash Disability Questionnaire
